# Supplementary material for: Osteocalcin-expressing endothelial progenitor cells and serum osteocalcin forms are independent biomarkers of coronary atherosclerotic disease severity in male and female patients
Source: PubMed Central journal article supplement (PMC9098612; doi:10.1007/s40618-022-01744-3), 2022-01-28
Supplement: 40618_2022_1744_MOESM1_ESM.pdf [file 40618_2022_1744_MOESM1_ESM.pdf]

## Supplementary data

**Supplementary Table 1.** Concomitant medications

| Medication          | Patients (%) |
|---------------------|--------------|
| Calcium antagonists | 26           |
| Beta Blockers       | 60           |
| ACE-I               | 19           |
| ARB                 | 16           |
| Nitrates            | 21           |
| Diuretics           | 12           |
| Hypoglycemic Agents | 16           |
| Statins             | 65           |
| Anti-Platelets      | 63           |
| Aspirin             | 65           |
| Anticoagulants      | 5            |
| (3-KAT) inhibitor   | 21           |
| Other drugs         | 35           |

ACE-I: angiotensin-converting enzyme inhibitor

ARB: Angiotensin receptor blockers

3-KAT: 3-ketoacyl coenzyme A thiolase
